# Supplementary material for: Case-control Indian buffet process identifies biomarkers of response to Codrituzumab
Source: Springer Nature journal article supplement (doi:10.1186/s12885-019-5472-0), 2019-03-28

(A) Biomarker profile for feature F1

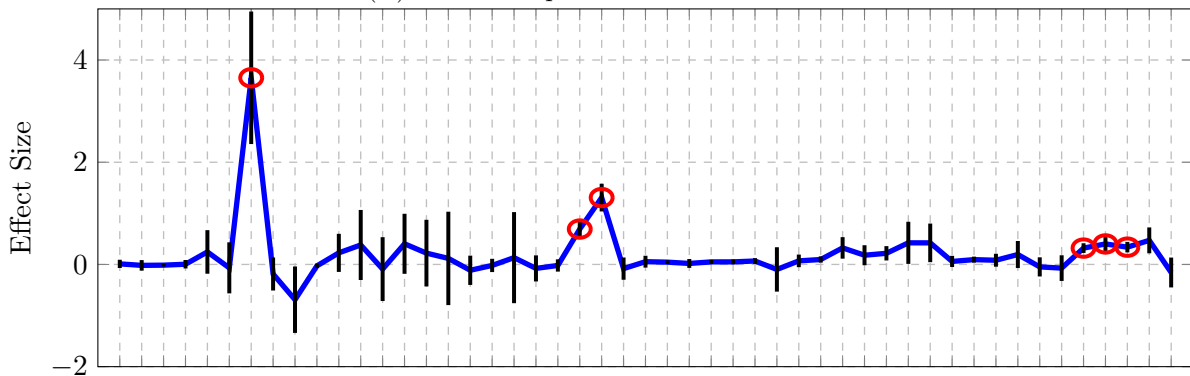

(B) Biomarker profile for feature F2

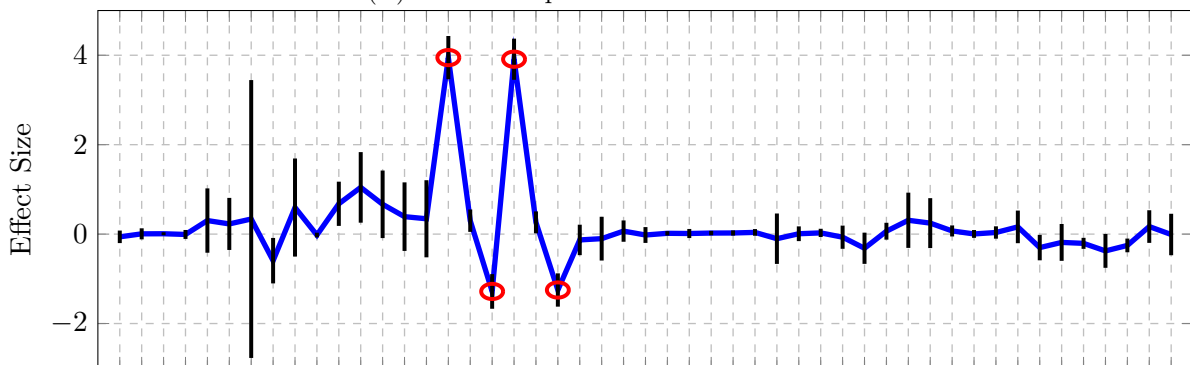

(C) Biomarker profile for feature F3

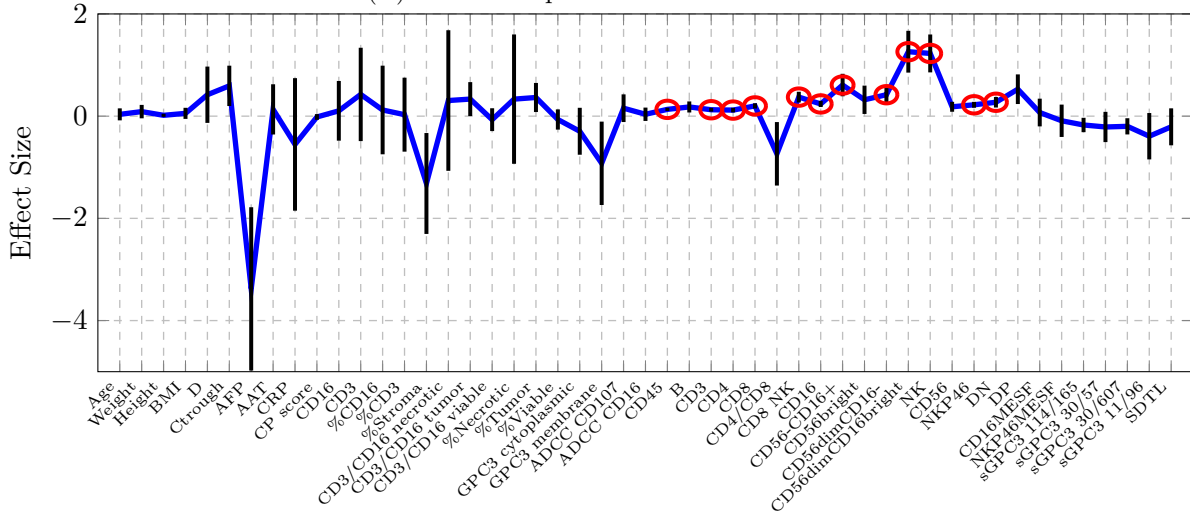

Supplement: MOESM4 [file 16582030]
